# Supplementary material
Source: PubMed Central journal article supplement (PMC4839521)
Supplement: npp201547x1.pdf [file npp201547x1.pdf]

## Supplementary Information

**Table S1.** Effects of loss of GLP-1R signalling on intrinsic properties of septal neurons. *n* = number of examined neurons.

|                                        | <i>Glp-1 r<sup>+/+</sup></i> (n= 21) | <i>Glp-1r<sup>-/-</sup></i> (n=23) | P-value |
|----------------------------------------|--------------------------------------|------------------------------------|---------|
| <i>Resting Membrane Potential (mV)</i> | -69.7 ± 15.6                         | -69.8 ± 14.6                       | 0.99    |
| <i>Cell Capacitance (pF)</i>           | 90.1 ± 21.9                          | 73.0 ± 15.2                        | 0.08    |
| <i>Input Resistance (MΩ)</i>           | 389.6 ± 85.0                         | 476.9 ± 99.5                       | 0.08    |
| <i>Membrane time constant (ms)</i>     | 51.9 ± 11.3                          | 40.4 ± 8.41                        | 0.07    |
| <i>AP threshold (mV)</i>               | -40.2 ± 8.7                          | -41.2 ± 8.6                        | 0.25    |
| <i>AP amplitude (mV)</i>               | 91.8 ± 20.0                          | 96.3 ± 20.0                        | 0.33    |
| <i>AP width at threshold (ms)</i>      | 1.9 ± 0.4                            | 1.8 ± 0.4                          | 0.41    |
| <i>fAHP (mV)</i>                       | 13.8 ± 3.0                           | 14.9 ± 3.1                         | 0.51    |
| <i>Threshold current (pA)</i>          | 44.8 ± 9.7                           | 32.6 ± 6.8                         | 0.12    |
